# Supplementary material for: A General Model of Radial Dispersion with Wellbore Mixing and Skin Effect
Source: Copernicus journal article supplement (doi:10.5194/hess-2022-372), 2022-11-21
Supplement: Supplementary file 1 [file hess-2022-372-supplement.pdf]

# 1 A General Model of Radial Dispersion with Wellbore Mixing and Skin Effects

2  
3 Wenguang Shi<sup>1</sup>, Quanrong Wang<sup>1,2,3\*</sup>, Hongbin Zhan<sup>4</sup>, and Renjie Zhou<sup>5</sup>

4  
5 <sup>1</sup>School of Environmental Studies, China University of Geosciences, 388 Lumo Road, Wuhan  
6 430074, China

7 <sup>2</sup>State Environmental Protection Key Laboratory of Source Apportionment and Control of  
8 Aquatic Pollution, Ministry of Ecology and Environment, Wuhan, Hubei 430074, PR China

9 <sup>3</sup>Hubei Key Laboratory of Yangtze River Basin Environmental Aquatic Science, School of  
10 Environmental Studies, China University of Geosciences, Wuhan, Hubei 430074, PR China

11 <sup>4</sup>Department of Geography and Geology, Sam Houston State University, 1905 University  
12 Avenue Huntsville, TX 77340, USA

13 <sup>5</sup>Department of Environmental and Geosciences, Sam Houston State University, Huntsville, TX  
14 77340, USA

15  
16 Corresponding author: Quanrong Wang ([wangqr@cug.edu.cn](mailto:wangqr@cug.edu.cn)).

## 17 18 19 **Supplementary Materials**

20 S1. Derivation of Eqs. (14a) - (15b).

21 S2. Derivation of Eqs. (17a) - (18b).

22 S3. The MIM model and solution in an aquifer-aquitard system.

23 S4. Numerical simulation by COMSOL Multiphysics.

24 S5. The fitness of the experimental data by Chao (1999).

25 S6. Figures S1 - S4.

## 27 Supplementary Materials

### 28 S1. Derivation of Eqs. (14a) - (15b)

29 The dimensionless parameters are defined as:  $C_{m1D} = \frac{C_{m1}}{C_0}$ ,  $C_{im1D} = \frac{C_{im1}}{C_0}$ ,  $C_{m2D} = \frac{C_{m2}}{C_0}$ ,

30  $C_{im2D} = \frac{C_{im2}}{C_0}$ ,  $C_{wD} = \frac{C_w}{C_0}$ ,  $C_{inj,D} = \frac{C_{inj}}{C_0}$ ,  $C_{cha,D} = \frac{C_{cha}}{C_0}$ ,  $t_D = \frac{|A|t}{\alpha_2^2 R_{m1}}$ ,  $t_{inj,D} = \frac{|A|t_{inj}}{\alpha_2^2 R_{m1}}$ ,  $r_D = \frac{r}{\alpha_2}$ ,

31  $r_{wD} = \frac{r_w}{\alpha_2}$ ,  $r_{sD} = \frac{r_s}{\alpha_2}$ ,  $r_{0D} = \frac{r_0}{\alpha_2}$ ,  $\mu_{m1D} = \frac{\alpha_2^2 \mu_{m1}}{A}$ ,  $\mu_{im1D} = \frac{\alpha_2^2 R_{m1} \mu_{im1}}{R_{im1} A}$ ,  $\mu_{m2D} = \frac{\alpha_2^2 \mu_{m2} R_{m1}}{A R_{m2}}$ ,  $\mu_{im2D} =$

32  $\frac{\alpha_2^2 R_{m1} \mu_{im2}}{R_{im2} A}$  and  $A = \frac{Q}{2\pi B \theta_{m1}}$ . After the dimensionless transform, the governing equations become

$$33 \quad \frac{\partial C_{m1D}}{\partial t_D} = \frac{\lambda}{r_D} \frac{\partial^2 C_{m1D}}{\partial r_D^2} - \frac{1}{r_D} \frac{\partial C_{m1D}}{\partial r_D} - \varepsilon_{m1} (C_{m1D} - C_{im1D})$$

$$34 \quad -\mu_{m1D} C_{m1D}, r_{wD} < r_D \leq r_{sD} \quad (A1a)$$

$$35 \quad \frac{\partial C_{im1D}}{\partial t_D} = \varepsilon_{im1} (C_{m1D} - C_{im1D}) - \mu_{im1D} C_{im1D}, r_{wD} < r_D \leq r_{sD}, \quad (A1b)$$

$$36 \quad \frac{\partial C_{m2D}}{\partial t_D} = \frac{\eta}{r_D} \frac{\partial^2 C_{m2D}}{\partial r_D^2} - \frac{\eta}{r_D} \frac{\partial C_{m2D}}{\partial r_D} - \varepsilon_{m2} (C_{m2D} - C_{im2D}) - \mu_{m2D} C_{m2D}, r_D > r_{sD}, \quad (A1c)$$

$$37 \quad \frac{\partial C_{im2D}}{\partial t_D} = \varepsilon_{im2} (C_{m2D} - C_{im2D}) - \mu_{im2D} C_{im2D}, r_D > r_{sD}, \quad (A1d)$$

38 where  $\varepsilon_{m1} = \frac{\omega_1 \alpha_2^2}{A \theta_{m1}}$ ,  $\varepsilon_{im1} = \frac{\omega_1 \alpha_2^2 R_{m1}}{A \theta_{im1} R_{im1}}$ ,  $\varepsilon_{m2} = \frac{\omega_2 \alpha_2^2 R_{m1}}{A \theta_{m2} R_{m2}}$ ,  $\varepsilon_{im2} = \frac{\omega_2 \alpha_2^2 R_{m1}}{A \theta_{im2} R_{im2}}$ ,  $\eta = \frac{\theta_{m1} R_{m1}}{\theta_{m2} R_{m2}}$  and  $\lambda = \frac{\alpha_1}{\alpha_2}$ .

39 As for the boundary conditions at the well screen, a Heaviside step function will be

40 employed to combine them at the injection and chasing phases:

$$41 \quad C_w(r_w, t) = C_{inj} [H(t) - H(t - t_{inj})] + C_{cha} H(t - t_{inj}), t > 0, \quad (A2)$$

42 where  $H(t)$  is the Heaviside step function,  $C_w(r_w, t)$  is concentration [ $ML^{-3}$ ] in the wellbore.

43 The dimensionless initial conditions and dimensionless boundary conditions are

$$44 \quad C_{m1D}(r_D, t_D)|_{t_D=0} = C_{im1D}(r_D, t_D)|_{t_D=0} = C_{m2D}(r_D, t_D)|_{t_D=0}$$

$$45 \quad = C_{im2D}(r_D, t_D)|_{t_D=0} = 0, r_D > r_{wD}, \quad (A3a)$$

$$46 \quad C_{m2D}(r_D, t_D)|_{r_D \rightarrow \infty} = C_{im2D}(r_D, t_D)|_{r_D \rightarrow \infty} = 0, t_D > 0, \quad (A3b)$$

$$47 \quad \left[ C_{m1D}(r_D, t_D) - \lambda \frac{\partial C_{m1D}(r_D, t_D)}{\partial r_D} \right] \Big|_{r_D=r_{wD}} = C_{inj,D}(t_D), 0 < t_D \leq t_{inj,D}, \quad (A4a)$$

$$48 \quad \left[ C_{m1D}(r_D, t_D) - \lambda \frac{\partial C_{m1D}(r_D, t_D)}{\partial r_D} \right] \Big|_{r_D=r_{wD}} = C_{cha,D}(t_D), t_D > t_{inj,D}, \quad (A4b)$$

$$49 \quad C_{wD}(r_{wD}, t_D) = C_{inj,D} [H(t_D) - H(t_D - t_{inj,D})] + C_{cha,D} H(t_D - t_{inj,D}). \quad (A4c)$$

50 The dimensionless forms of Eqs. (7) - (8) are

$$51 \quad \beta_{inj} \frac{dC_{inj,D}(t_D)}{dt_D} = 1 - C_{inj,D}(t_D), 0 < t_D \leq t_{inj,D}, \quad (A5a)$$

$$52 \quad \beta_{cha} \frac{dC_{cha,D}(t_D)}{dt_D} = -C_{cha,D}(t_D), t_D > t_{inj,D}, \quad (A5b)$$

$$53 \quad \text{where } \beta_{inj} = \frac{V_{w,inj} r_{wD}}{\xi R_{m1} \alpha_2} \text{ and } \beta_{cha} = \frac{V_{w,cha} r_{wD}}{\xi R_{m1} \alpha_2}.$$

54 The dimensionless forms of Eqs. (12) - (13) are

$$55 \quad C_{m1D}(r_{sD}, t_D) = C_{m2D}(r_{sD}, t_D), t_D > 0, \quad (A6a)$$

$$56 \quad \left[ \lambda \frac{\partial C_{m1D}(r_D, t_D)}{\partial r_D} \right] \Big|_{r_D=r_{sD}} = \left[ \frac{\partial C_{m2D}(r_D, t_D)}{\partial r_D} \right] \Big|_{r_D=r_{sD}}, t_D > 0, \quad (A6b)$$

57 Conducting Laplace transform to Eqs. (A1a) - (A1b), one has

$$58 \quad s \bar{C}_{m1D} = \frac{\lambda}{r_D} \frac{\partial^2 \bar{C}_{m1D}}{\partial r_D^2} - \frac{1}{r_D} \frac{\partial \bar{C}_{m1D}}{\partial r_D} - \varepsilon_{m1} (\bar{C}_{m1D} - \bar{C}_{im1D}) - \mu_{m1D} \bar{C}_{m1D}, \quad (A7a)$$

$$59 \quad s \bar{C}_{im1D} = \varepsilon_{im1} (\bar{C}_{m1D} - \bar{C}_{im1D}) - \mu_{im1D} \bar{C}_{im1D}, \quad (A7b)$$

60 where the over bar represents the variable in Laplace domain;  $s$  is the Laplace transform

61 parameter in respect to the dimensionless time  $t_D$ .

62 Substituting Eq. (A7b) into Eq. (A7a), one has

$$63 \quad \frac{\lambda}{r_D} \frac{\partial^2 \bar{C}_{m1D}}{\partial r_D^2} - \frac{1}{r_D} \frac{\partial \bar{C}_{m1D}}{\partial r_D} - E_1 \bar{C}_{m1D} = 0, r_{wD} < r_D \leq r_{sD}, \quad (A8)$$

$$64 \quad \text{where } E_1 = s + \varepsilon_{m1} + \mu_{m1D} - \frac{\varepsilon_{m1} \varepsilon_{im1}}{s + \varepsilon_{im1} + \mu_{im1D}}.$$

65 Conducting Laplace transform to Eqs. (A1c) - (A1d), one has

$$66 \quad s\bar{C}_{m2D} = \frac{\eta}{r_D} \frac{\partial^2 \bar{C}_{m2D}}{\partial r_D^2} - \frac{\eta}{r_D} \frac{\partial \bar{C}_{m2D}}{\partial r_D} - \varepsilon_{m2}(\bar{C}_{m2D} - \bar{C}_{im2D}) - \mu_{m2D} \bar{C}_{m2D}, \quad (\text{A9a})$$

$$67 \quad s\bar{C}_{im2D} = \varepsilon_{im2}(\bar{C}_{m2D} - \bar{C}_{im2D}) - \mu_{im2D} \bar{C}_{im2D}. \quad (\text{A9b})$$

68 Substituting Eq. (A9b) into Eq. (A9a), one has

$$69 \quad \frac{1}{r_D} \frac{\partial^2 \bar{C}_{m2D}}{\partial r_D^2} - \frac{1}{r_D} \frac{\partial \bar{C}_{m2D}}{\partial r_D} - E_2 \bar{C}_{m2D} = 0, \quad r_D > r_{sD}, \quad (\text{A10})$$

$$70 \quad \text{where } E_2 = \frac{1}{\eta} \left( s + \varepsilon_{m2} + \mu_{m2D} - \frac{\varepsilon_{m2} \varepsilon_{im2}}{s + \varepsilon_{im2} + \mu_{im2D}} \right).$$

71 The boundary conditions in the Laplace domain are

$$72 \quad \left[ \bar{C}_{m1D}(r_D, s) - \lambda \frac{\partial \bar{C}_{m1D}(r_D, s)}{\partial r_D} \right] \Big|_{r_D=r_{wD}} = \frac{1}{s(s\beta_{inj}+1)}, \quad 0 < t_D \leq t_{inj,D}, \quad (\text{A11a})$$

$$73 \quad \left[ \bar{C}_{m1D}(r_D, s) - \lambda \frac{\partial \bar{C}_{m1D}(r_D, s)}{\partial r_D} \right] \Big|_{r_D=r_{wD}} = \frac{\beta_{cha} C_{inj,D}(r_{wD}, t_{inj,D})}{(s\beta_{cha}+1)}, \quad t_D > t_{inj,D}, \quad (\text{A11b})$$

$$74 \quad \bar{C}_{m1D}(r_{sD}, s) = \bar{C}_{m2D}(r_{sD}, s), \quad t_D > 0, \quad (\text{A11c})$$

$$75 \quad \lambda \left[ \frac{\partial \bar{C}_{m1D}(r_D, s)}{\partial r_D} \right] \Big|_{r_D=r_{sD}} = \left[ \frac{\partial \bar{C}_{m2D}(r_D, s)}{\partial r_D} \right] \Big|_{r_D=r_{sD}}, \quad t_D > 0, \quad (\text{A11d})$$

$$76 \quad \bar{C}_{m2D}(r_D, s) \Big|_{r_D \rightarrow \infty} = 0, \quad t_D > 0, \quad (\text{A11e})$$

77 The general solutions of Eq. (A8) and Eq. (A10) are respectively

$$78 \quad \bar{C}_{m1D} = N_1 \exp\left(\frac{r_D}{2\lambda}\right) A_i(y_1) + N_2 \exp\left(\frac{r_D}{2\lambda}\right) B_i(y_1), \quad r_{wD} < r_D \leq r_{sD}, \quad (\text{A12a})$$

$$79 \quad \bar{C}_{m2D} = N_3 \exp\left(\frac{r_D}{2}\right) A_i(y_2) + N_4 \exp\left(\frac{r_D}{2}\right) B_i(y_2), \quad r_D > r_{sD}, \quad (\text{A12b})$$

$$80 \quad \text{where } y_1 = \left(\frac{E_1}{\lambda}\right)^{1/3} \left(r_D + \frac{1}{4\lambda E_1}\right); \quad y_2 = (E_2)^{1/3} \left(r_D + \frac{1}{4E_2}\right); \quad N_1, N_2, N_3 \text{ and } N_4 \text{ are constants}$$

81 which could be determined by the boundary conditions.  $A_i(\cdot)$  and  $B_i(\cdot)$  are the Airy functions of

82 the first kind and second kind, respectively.

83 Substituting Eq. (A12b) into Eq. (A11e), one has

$$84 \quad N_4 = 0. \quad (\text{A13})$$

85 Substituting Eq. (A12a) into Eq. (A11a), one has

$$\begin{aligned}
86 \quad & N_1 \exp\left(\frac{r_{wD}}{2\lambda}\right) \left[ \frac{1}{2} A_i(y_w) - \lambda \left(\frac{E_1}{\lambda}\right)^{1/3} A'_i(y_w) \right] + N_2 \exp\left(\frac{r_{wD}}{2\lambda}\right) \left[ \frac{1}{2} B_i(y_w) - \right. \\
87 \quad & \left. \lambda \left(\frac{E_1}{\lambda}\right)^{1/3} \exp\left(\frac{r_{wD}}{2}\right) B'_i(y_w) \right] = F_1, \tag{A14a}
\end{aligned}$$

$$88 \quad \text{where } y_w = \left(\frac{E_1}{\lambda}\right)^{1/3} \left(r_{wD} + \frac{1}{4\lambda E_1}\right), \text{ and } F_1 = \frac{1}{s(s\beta_{inj}+1)}.$$

89 Substituting Eq. (A12a) into Eq. (A11b), one has

$$\begin{aligned}
90 \quad & N_1 \exp\left(\frac{r_{wD}}{2\lambda}\right) \left[ \frac{1}{2} A_i(y_w) - \lambda \left(\frac{E_1}{\lambda}\right)^{1/3} A'_i(y_w) \right] + N_2 \exp\left(\frac{r_{wD}}{2\lambda}\right) \left[ \frac{1}{2} B_i(y_w) - \right. \\
91 \quad & \left. \lambda \left(\frac{E_1}{\lambda}\right)^{1/3} \exp\left(\frac{r_{wD}}{2}\right) B'_i(y_w) \right] = F_2, \tag{A14b}
\end{aligned}$$

$$92 \quad \text{where } F_2 = \frac{\beta_{cha} C_{inj,D}(r_{wD}, t_{inj,D})}{(s\beta_{cha}+1)}.$$

93 Conducting Laplace transform on Eq. (A4c), one has

$$94 \quad \bar{C}_{wD}(r_{wD}, s) = C_{inj,D} \frac{1 - \exp(-t_{inj,D}s)}{s} + C_{cha,D} \frac{\exp(-t_{inj,D}s)}{s}, r_D = r_{wD}, \tag{A14c}$$

95 Thus, Eqs. (A14a)-( A14c) could be combined as the following equation

$$\begin{aligned}
96 \quad & N_1 \exp\left(\frac{r_{wD}}{2\lambda}\right) \left[ \frac{1}{2} A_i(y_w) - \lambda \left(\frac{E_1}{\lambda}\right)^{1/3} A'_i(y_w) \right] + N_2 \exp\left(\frac{r_{wD}}{2\lambda}\right) \left[ \frac{1}{2} B_i(y_w) - \right. \\
97 \quad & \left. \lambda \left(\frac{E_1}{\lambda}\right)^{1/3} \exp\left(\frac{r_{wD}}{2}\right) B'_i(y_w) \right] = F, \tag{A14d}
\end{aligned}$$

$$98 \quad \text{where } F = C_{inj,D} \frac{1 - \exp(-t_{inj,D}s)}{s} + C_{cha,D} \frac{\exp(-t_{inj,D}s)}{s}.$$

99 Substituting Eqs. (A12a) - (A12b) into Eq. (A11c), one has

$$100 \quad N_1 \exp\left(\frac{r_{sD}}{2\lambda}\right) A_i(y_{1s}) + N_2 \exp\left(\frac{r_{sD}}{2\lambda}\right) B_i(y_{1s}) = N_3 \exp\left(\frac{r_{sD}}{2}\right) A_i(y_{2s}), \tag{A15}$$

$$101 \quad \text{where } y_{1s} = \left(\frac{E_1}{\lambda}\right)^{1/3} \left(r_{sD} + \frac{1}{4\lambda E_1}\right); y_{2s} = (E_2)^{1/3} \left(r_{sD} + \frac{1}{4E_2}\right).$$

102 Substituting Eqs. (A12a) - (A12b) into Eq. (A11d) yields

$$\begin{aligned}
103 \quad & N_1 \exp\left(\frac{r_{SD}}{2\lambda}\right) \left[ \frac{1}{2} A_i(y_{1s}) + \lambda \left(\frac{E_1}{\lambda}\right)^{1/3} A_i'(y_{1s}) \right] + N_2 \exp\left(\frac{r_{SD}}{2\lambda}\right) \left[ \frac{1}{2} B_i(y_{1s}) + \right. \\
104 \quad & \left. \lambda \left(\frac{E_1}{\lambda}\right)^{1/3} B_i'(y_{1s}) \right] = N_3 \exp\left(\frac{r_{SD}}{2}\right) \left[ \frac{1}{2} A_i(y_{2s}) + (E_2)^{1/3} A_i'(y_{2s}) \right], \tag{A16}
\end{aligned}$$

105 where  $A_i'(\cdot)$  and  $B_i'(\cdot)$  are the derivative of the Airy functions of the first kind and second kind,  
106 respectively.

107 The values of  $N_1$ ,  $N_2$ , and  $N_3$  could be determined by solving Eqs. (A14d) - (A16):

$$108 \quad N_1 = \frac{F - H_2 N_2}{H_1},$$

$$109 \quad N_2 = \frac{H_3 H_8 F - H_5 H_6 F}{H_1 H_5 H_7 + H_2 H_3 H_8 - H_2 H_5 H_6 - H_1 H_4 H_8},$$

$$110 \quad N_3 = \frac{H_3 F}{H_1 H_5} - \frac{H_2 H_3 N_2}{H_1 H_5} + \frac{H_4 N_2}{H_5},$$

$$111 \quad \text{where } H_1 = \exp\left(\frac{r_{wD}}{2\lambda}\right) \left[ \frac{1}{2} A_i(y_w) - \lambda \left(\frac{E_1}{\lambda}\right)^{1/3} A_i'(y_w) \right],$$

$$112 \quad H_2 = \exp\left(\frac{r_{wD}}{2\lambda}\right) \left[ \frac{1}{2} B_i(y_w) - \lambda \left(\frac{E_1}{\lambda}\right)^{1/3} \exp\left(\frac{r_{wD}}{2}\right) B_i'(y_w) \right],$$

$$113 \quad H_3 = \exp\left(\frac{r_{SD}}{2\lambda}\right) A_i(y_{1s}), H_4 = \exp\left(\frac{r_{SD}}{2\lambda}\right) B_i(y_{1s}), H_5 = \exp\left(\frac{r_{SD}}{2}\right) A_i(y_{2s}),$$

$$114 \quad H_6 = \exp\left(\frac{r_{SD}}{2\lambda}\right) \left[ \frac{1}{2} A_i(y_{1s}) + \lambda \left(\frac{E_1}{\lambda}\right)^{1/3} A_i'(y_{1s}) \right],$$

$$115 \quad H_7 = \exp\left(\frac{r_{SD}}{2\lambda}\right) \left[ \frac{1}{2} B_i(y_{1s}) + \lambda \left(\frac{E_1}{\lambda}\right)^{1/3} B_i'(y_{1s}) \right],$$

$$116 \quad H_8 = \exp\left(\frac{r_{SD}}{2}\right) \left[ \frac{1}{2} A_i(y_{2s}) + (E_2)^{1/3} A_i'(y_{2s}) \right],$$

$$117 \quad \text{and } F = C_{inj,D} \frac{1 - \exp(-t_{inj,DS})}{s} + C_{cha,D} \frac{\exp(-t_{inj,DS})}{s}. \text{ Substituting the expressions of } N_1, N_2, N_3,$$

118 and  $N_4$  into Eqs. (A12a) - (A12b), one could get the solutions of Eq. (14a) and Eq. (15a).

119 Substituting Eqs. (A12a) - (A12b) into Eq. (A7b) and Eq. (A9b), one could get the solutions

120 of Eq. (14b) and Eq. (15b)

$$121 \quad \bar{C}_{im1D} = \frac{\varepsilon_{im1}}{s + \varepsilon_{im1} + \mu_{im1D}} \bar{C}_{m1D}, r_{wD} \leq r_D \leq r_{sD}, \quad (A17a)$$

$$122 \quad \bar{C}_{im2D} = \frac{\varepsilon_{im2}}{s + \varepsilon_{im2} + \mu_{im2D}} \bar{C}_{m2D}, r_D > r_{sD}. \quad (A17b)$$

123 In the injection phase, the values of  $N_1$  and  $N_2$  are modified into  $N'_1$  and  $N'_2$  as follows

$$124 \quad N'_1 = \frac{F_1 - H_2 N'_2}{H'_1} \text{ and } N'_2 = \frac{H_3 H_8 F_1 - H_5 H_6 F_1}{H'_1 H_5 H_7 + H_2 H_3 H_8 - H_2 H_5 H_6 - H'_1 H_4 H_8}, \text{ where } H'_1 = \exp\left(\frac{r_{wD}}{2\lambda}\right) A_i(y_w).$$

125 Substituting  $N'_1$  and  $N'_2$  into Eq. (A12a), one has

$$126 \quad \bar{C}_{inj,D} = N'_1 \exp\left(\frac{r_D}{2\lambda}\right) A_i(y_1) + N'_2 \exp\left(\frac{r_D}{2\lambda}\right) B_i(y_1), r_D = r_{wD}, \quad (A18)$$

127 In the chasing phase, the values of  $N_1$  and  $N_2$  are modified into  $N''_1$  and  $N''_2$  as follows

$$128 \quad N''_1 = \frac{F_2 - H_2 N''_2}{H'_1}, N''_2 = \frac{H_3 H_8 F_2 - H_5 H_6 F_2}{H'_1 H_5 H_7 + H_2 H_3 H_8 - H_2 H_5 H_6 - H'_1 H_4 H_8}, \text{ and substituting } N''_1 \text{ and } N''_2 \text{ into Eq.}$$

129 (A12a), one has

$$130 \quad \bar{C}_{cha,D} = N''_1 \exp\left(\frac{r_D}{2\lambda}\right) A_i(y_1) + N''_2 \exp\left(\frac{r_D}{2\lambda}\right) B_i(y_1), r_D = r_{wD}, \quad (A19)$$

## 131 **S2. Model with scale-dependent dispersivity: Derivation of Eqs. (17a) - (18b)**

132 Substituting Eq. (16) into Eq. (1c), the dimensionless form of the governing equations

133 become

$$134 \quad \frac{\partial C_{m2D}}{\partial t_D} = \frac{k\eta \partial^2 C_{m2D}}{\partial r_D^2} + \frac{k\eta - \eta}{r_D} \frac{\partial C_{m2D}}{\partial r_D} - \varepsilon_{m2}(C_{m2D} - C_{im2D}) - \mu_{m2D} C_{m2D}, r_{sD} \leq r_D \leq r_{0D}, (B2a)$$

$$135 \quad \frac{\partial C_{m2D}}{\partial t_D} = \frac{\eta}{r_D} \frac{\partial^2 C_{m2D}}{\partial r_D^2} - \frac{\eta}{r_D} \frac{\partial C_{m2D}}{\partial r_D} - \varepsilon_{m2}(C_{m2D} - C_{im2D}) - \mu_{m2D} C_{m2D}, r_D \geq r_{0D}. \quad (B1b)$$

136 Similarly, one could obtain the dimensionless initial conditions and dimensionless boundary

137 conditions, the expressions of the dimensionless initial conditions and dimensionless boundary

138 conditions are the same with Eqs. (A3a) - (A6b), except that

$$139 \quad \left[ \lambda \frac{\partial C_{m1D}(r_D, t_D)}{\partial r_D} \right] \Big|_{r_D=r_{sD}} = \left[ k \frac{\partial C_{m2D}(r_D, t_D)}{\partial r_D} \right] \Big|_{r_D=r_{sD}}. \quad (B2)$$

140 In the formation zone, we could obtain the boundary condition at  $r_D = r_{0D}$

$$141 \quad kr_D \frac{\partial C_{m2D}(r_D, t_D)}{\partial r_D} = \frac{\partial C_{m2D}(r_D, t_D)}{\partial r_D}, r_D = r_{0D}, \quad (\text{B3})$$

142 Then conducting Laplace transform to Eqs. (B1a)- (B1b), one has

$$143 \quad s\bar{C}_{m2D} = k\eta \frac{\partial^2 \bar{C}_{m2D}}{\partial r_D^2} + \frac{k\eta - \eta}{r_D} \frac{\partial \bar{C}_{m2D}}{\partial r_D} - \varepsilon_{m2}(\bar{C}_{m2D} - \bar{C}_{im2D}) - \mu_{m2D} \bar{C}_{m2D}, r_{sD} \leq r_D \leq r_{0D} (\text{B4a})$$

$$144 \quad s\bar{C}_{m2D} = \frac{\eta}{r_D} \frac{\partial^2 \bar{C}_{m2D}}{\partial r_D^2} - \frac{\eta}{r_D} \frac{\partial \bar{C}_{m2D}}{\partial r_D} - \varepsilon_{m2}(\bar{C}_{m2D} - \bar{C}_{im2D}) - \mu_{m2D} \bar{C}_{m2D}, r_D \geq r_{0D} \quad (\text{B4b})$$

145 Substituting Eq. (A9b) into Eqs. (B4a) - (B4b), one has

$$146 \quad \frac{\partial^2 \bar{C}_{m2D}}{\partial r_D^2} + \frac{n}{r_D} \frac{\partial \bar{C}_{m2D}}{\partial r_D} - \varepsilon_1^2 \bar{C}_{m2D} = 0, r_{sD} \leq r_D \leq r_{0D}, \quad (\text{B5a})$$

$$147 \quad \frac{1}{r_D} \frac{\partial^2 \bar{C}_{m2D}}{\partial r_D^2} - \frac{1}{r_D} \frac{\partial \bar{C}_{m2D}}{\partial r_D} - \varepsilon_1^2 \bar{C}_{m2D} = 0, r_D > r_{0D}. \quad (\text{B5b})$$

148 where  $n = 1 - \frac{1}{k}$  and  $\varepsilon_1 = \sqrt{\frac{E_2}{k\eta}}$ .

149 Similar to Eqs. (A11a) - (A11e) and Eq. (B2), the boundary conditions at wellbore and

150 infinity in the Laplace domain are

$$151 \quad \left[ \bar{C}_{m1D}(r_D, s) - \lambda \frac{\partial \bar{C}_{m1D}(r_D, s)}{\partial r_D} \right] \Big|_{r_D=r_{wD}} = \frac{1}{s(s\beta_{inj}+1)}, \quad (\text{B6a})$$

$$152 \quad \left[ \bar{C}_{m1D}(r_D, s) - \lambda \frac{\partial \bar{C}_{m1D}(r_D, s)}{\partial r_D} \right] \Big|_{r_D=r_{wD}} = \frac{\beta_{cha} C_{inj,D}(r_{wD}, t_{inj,D})}{(s\beta_{cha}+1)}, \quad (\text{B6b})$$

$$153 \quad \bar{C}_{m1D}(r_{sD}, s) = \bar{C}_{m2D}(r_{sD}, s), \quad (\text{B6c})$$

$$154 \quad \left[ \lambda \frac{\partial \bar{C}_{m1D}(r_D, s)}{\partial r_D} \right] \Big|_{r_D=r_{sD}} = \left[ k \frac{\partial \bar{C}_{m2D}(r_D, s)}{\partial r_D} \right] \Big|_{r_D=r_{sD}}, \quad (\text{B6d})$$

$$155 \quad \left[ kr_D \frac{\partial \bar{C}_{m2D}(r_D, s)}{\partial r_D} \right] \Big|_{r_D=r_{0D}} = \left[ \frac{\partial \bar{C}_{m2D}(r_D, s)}{\partial r_D} \right] \Big|_{r_D=r_{0D}}, \quad (\text{B6e})$$

$$156 \quad \bar{C}_{m2D}(r_{0D}, s) = \bar{C}_{m2D}(r_{0D}, s), \quad (\text{B6f})$$

$$157 \quad \bar{C}_{m2D}(r_D, s) \Big|_{r_D \rightarrow \infty} = 0. \quad (\text{B6g})$$

158 The general solutions of Eq. (A8) and Eq. (B4) are respectively



$$159 \quad \bar{C}_{m1D} = \mathcal{J}_1 \exp\left(\frac{r_D}{2\lambda}\right) A_i(y_1) + \mathcal{J}_2 \exp\left(\frac{r_D}{2\lambda}\right) B_i(y_1), r_{wD} < r_D \leq r_{sD}, \quad (\text{B7a})$$

$$160 \quad \bar{C}_{m2D} = \mathcal{J}_3 r_D^m K_m(\varepsilon_1 r_D) + \mathcal{J}_4 r_D^m I_m(\varepsilon_1 r_D), r_{sD} \leq r_D \leq r_{0D}, \quad (\text{B7b})$$

$$161 \quad \bar{C}_{m2D} = \mathcal{J}_5 \exp\left(\frac{r_D}{2}\right) A_i(y_3) + \mathcal{J}_6 \exp\left(\frac{r_D}{2}\right) B_i(y_3), r_D > r_{0D}, \quad (\text{B7c})$$

162 where  $m = \frac{1}{2k}$ ;  $y_3 = (\varepsilon_1)^{1/3} \left(r_D + \frac{1}{4\varepsilon_1}\right)$ ;  $\mathcal{J}_1, \mathcal{J}_2, \mathcal{J}_3, \mathcal{J}_4, \mathcal{J}_5$  and  $\mathcal{J}_6$  are constants which could be  
 163 determined by the boundary conditions;  $I_m$  and  $K_m$  are the  $m^{\text{th}}$ -order modified Bessel functions  
 164 of the first kind and second kind, respectively.

165 Substituting Eq. (B6f) into Eq. (B7c), one has

$$166 \quad \mathcal{J}_6 = 0. \quad (\text{B8})$$

167 Substituting Eq. (B7a) into Eq. (B6a), one has

$$168 \quad \mathcal{J}_1 \exp\left(\frac{r_{wD}}{2\lambda}\right) \left[ \frac{1}{2} A_i(y_w) - \lambda \left(\frac{E_1}{\lambda}\right)^{1/3} A_i'(y_w) \right] + \mathcal{J}_2 \exp\left(\frac{r_{wD}}{2\lambda}\right) \left[ \frac{1}{2} B_i(y_w) - \right. \\ 169 \quad \left. \lambda \left(\frac{E_1}{\lambda}\right)^{1/3} \exp\left(\frac{r_{wD}}{2}\right) B_i'(y_w) \right] = F_1. \quad (\text{B9})$$

170 Substituting Eq. (B7a) into Eq. (B6b), one has

$$171 \quad \mathcal{J}_1 \exp\left(\frac{r_{wD}}{2\lambda}\right) \left[ \frac{1}{2} A_i(y_w) - \lambda \left(\frac{E_1}{\lambda}\right)^{1/3} A_i'(y_w) \right] + \mathcal{J}_2 \exp\left(\frac{r_{wD}}{2\lambda}\right) \left[ \frac{1}{2} B_i(y_w) - \right. \\ 172 \quad \left. \lambda \left(\frac{E_1}{\lambda}\right)^{1/3} \exp\left(\frac{r_{wD}}{2}\right) B_i'(y_w) \right] = F_2, \quad (\text{B10a})$$

173 Similar to the treatment of Eq. (A14d), Eqs. (B9)-(B10a) could be combined as the  
 174 following equation

$$175 \quad \mathcal{J}_1 \exp\left(\frac{r_{wD}}{2\lambda}\right) \left[ \frac{1}{2} A_i(y_w) - \lambda \left(\frac{E_1}{\lambda}\right)^{1/3} A_i'(y_w) \right] + \mathcal{J}_2 \exp\left(\frac{r_{wD}}{2\lambda}\right) \left[ \frac{1}{2} B_i(y_w) - \right. \\ 176 \quad \left. \lambda \left(\frac{E_1}{\lambda}\right)^{1/3} \exp\left(\frac{r_{wD}}{2}\right) B_i'(y_w) \right] = F, \quad (\text{B10b})$$

$$177 \quad \text{where } F = C_{inj,D} \frac{1 - \exp(-t_{inj,DS})}{s} + C_{cha,D} \frac{\exp(-t_{inj,DS})}{s}.$$

178 Substituting Eqs. (B7a) - (B7b) into Eq. (B6c), one has

$$179 \quad \mathcal{J}_1 \exp\left(\frac{r_{SD}}{2\lambda}\right) A_i(y_{1s}) + \mathcal{J}_2 \exp\left(\frac{r_{SD}}{2\lambda}\right) B_i(y_{1s}) = \mathcal{J}_3 r_{SD}^m K_m(\varepsilon_1 r_{SD}) + \mathcal{J}_4 r_D^m I_m(\varepsilon_1 r_D), \quad (\text{B11})$$

180 Substituting Eqs. (B7a) - (B7b) into Eq. (B6d) yields

$$181 \quad \mathcal{J}_1 \exp\left(\frac{r_{SD}}{2\lambda}\right) \left[ \frac{1}{2} A_i(y_{1s}) + \lambda \left(\frac{E_1}{\lambda}\right)^{1/3} A_i'(y_{1s}) \right] + \mathcal{J}_2 \exp\left(\frac{r_{SD}}{2\lambda}\right) \left[ \frac{1}{2} B_i(y_{1s}) + \lambda \left(\frac{E_1}{\lambda}\right)^{1/3} B_i'(y_{1s}) \right] =$$

$$182 \quad -\mathcal{J}_3 k \varepsilon_1 r_{SD}^{m+1} K_{m-1}(\varepsilon_1 r_{SD}) + \mathcal{J}_4 k \{ m r_{SD}^{m-1} I_m(\varepsilon_1 r_D) + 0.5 \varepsilon_1 r_{SD}^m [I_{m-1}(\varepsilon_1 r_D) + I_{m+1}(\varepsilon_1 r_D)] \}, \quad (\text{B12})$$

183 where  $K_{m-1}(\cdot)$  is the derivative of the  $m^{\text{th}}$ -order modified Bessel function of the second kind,

184  $I_{m-1}(\cdot)$  and  $I_{m+1}(\cdot)$  are the derivatives of the  $m^{\text{th}}$ -order modified Bessel function of the first

185 kind.

186 Substituting Eqs. (B7b)-(B7c) into Eq. (B6e) and Eq. (B6f) yields

$$187 \quad -\mathcal{J}_3 k \varepsilon_1 r_{0D}^{m+2} K_{m-1}(\varepsilon_1 r_{0D}) + \mathcal{J}_4 k \{ m r_{0D}^m I_m(\varepsilon_1 r_{0D}) + 0.5 \varepsilon_1 r_{0D}^{m+1} [I_{m-1}(\varepsilon_1 r_{0D}) +$$

$$188 \quad I_{m+1}(\varepsilon_1 r_{0D})] \} = \mathcal{J}_5 \left[ 0.5 \exp\left(\frac{r_D}{2}\right) A_i(y_4) + \varepsilon_1^{1/3} \exp\left(\frac{r_D}{2}\right) A_i'(y_4) \right], \quad (\text{B13})$$

$$189 \quad \mathcal{J}_3 r_{0D}^m K_m(\varepsilon_1 r_{0D}) + \mathcal{J}_4 r_{0D}^m I_m(\varepsilon_1 r_{0D}) = \mathcal{J}_5 \exp\left(\frac{r_{0D}}{2}\right) A_i(y_4), \quad (\text{B14})$$

190 where  $y_4 = (\varepsilon_1)^{1/3} \left( r_{0D} + \frac{1}{4\varepsilon_1} \right)$ .

191 The values of  $\mathcal{J}_1, \mathcal{J}_2, \mathcal{J}_3, \mathcal{J}_4, \mathcal{J}_5$  and  $\mathcal{J}_6$  could be determined by solving Eqs. (B8) - (B14),

192 one has

$$193 \quad \mathcal{J}_1 = \frac{F - W_2 \mathcal{J}_2}{W_1},$$

$$194 \quad \mathcal{J}_2 = \frac{W_1 W_5}{W_1 W_4 - W_2 W_3} \mathcal{J}_3 + \frac{W_1 W_6}{W_1 W_4 - W_2 W_3} \mathcal{J}_4 - \frac{W_3 F}{W_1 W_4 - W_2 W_3},$$

$$195 \quad \mathcal{J}_3 = \frac{W_{13} W_{15} - W_{12} W_{16}}{W_{11} W_{16} - W_{13} W_{14}} \mathcal{J}_4,$$

$$196 \quad \mathcal{J}_4 = \frac{W_3 F (W_1 W_8 - W_2 W_7) - W_7 F (W_1 W_4 - W_2 W_3)}{(W_1 W_5 \Theta + W_1 W_6) (W_1 W_8 - W_2 W_7) - (W_1 W_9 \Theta - W_1 W_{10}) (W_1 W_4 - W_2 W_3)} \text{ and } \mathcal{J}_5 = \frac{W_{14}}{W_{16}} \mathcal{J}_3 + \frac{W_{15}}{W_{16}} \mathcal{J}_4.$$

197 where  $W_1 = \exp\left(\frac{r_{wD}}{2\lambda}\right) \left[ \frac{1}{2} A_i(y_w) - \lambda \left(\frac{E_1}{\lambda}\right)^{1/3} A_i'(y_w) \right],$

$$\begin{aligned}
198 \quad W_2 &= \exp\left(\frac{r_{wD}}{2\lambda}\right) \left[ \frac{1}{2} B_i(y_w) - \lambda \left(\frac{E_1}{\lambda}\right)^{1/3} \exp\left(\frac{r_{wD}}{2}\right) B_i'(y_w) \right], \\
199 \quad W_3 &= \exp\left(\frac{r_{sD}}{2\lambda}\right) A_i(y_{1s}), \exp\left(\frac{r_{sD}}{2\lambda}\right) B_i(y_{1s}), W_5 = r_{sD}^m K_m(\varepsilon_1 r_{sD}), W_6 = r_D^m I_m(\varepsilon_1 r_D), \\
200 \quad W_7 &= \exp\left(\frac{r_{sD}}{2\lambda}\right) \left[ \frac{1}{2} A_i(y_{1s}) + \lambda \left(\frac{E_1}{\lambda}\right)^{1/3} A_i'(y_{1s}) \right], \\
201 \quad W_8 &= \exp\left(\frac{r_{sD}}{2\lambda}\right) \left[ \frac{1}{2} B_i(y_{1s}) + \lambda \left(\frac{E_1}{\lambda}\right)^{1/3} B_i'(y_{1s}) \right], \\
202 \quad W_9 &= -k\varepsilon_1 r_{sD}^{m+1} K_{m-1}(\varepsilon_1 r_{sD}), \\
203 \quad W_{10} &= k\{mr_{sD}^{m-1} I_m(\varepsilon_1 r_D) + 0.5\varepsilon_1 r_{sD}^m [I_{m-1}(\varepsilon_1 r_D) + I_{m+1}(\varepsilon_1 r_D)]\}, \\
204 \quad W_{11} &= -k\varepsilon_1 r_{0D}^{m+2} K_{m-1}(\varepsilon_1 r_{0D}), \\
205 \quad W_{12} &= k\{mr_{0D}^m I_m(\varepsilon_1 r_{0D}) + 0.5\varepsilon_1 r_{0D}^{m+1} [I_{m-1}(\varepsilon_1 r_{0D}) + I_{m+1}(\varepsilon_1 r_{0D})]\}, \\
206 \quad W_{13} &= 0.5 \exp\left(\frac{r_D}{2}\right) A_i(y_4) + \varepsilon_1^{1/3} \exp\left(\frac{r_D}{2}\right) A_i'(y_4), \\
207 \quad W_{14} &= r_{0D}^m K_m(\varepsilon_1 r_{0D}), W_{15} = r_{0D}^m I_m(\varepsilon_1 r_{0D}), W_{16} = \exp\left(\frac{r_{0D}}{2}\right) A_i(y_4) \text{ and } \Theta = \\
208 \quad &\frac{W_{13}W_{15} - W_{12}W_{16}}{W_{11}W_{16} - W_{13}W_{14}}
\end{aligned}$$

209 In the injection phase, the values of  $\mathcal{J}_1$  and  $\mathcal{J}_2$  are modified into  $\mathcal{J}'_1$  and  $\mathcal{J}'_2$  as follows

$$210 \quad \mathcal{J}'_1 = \frac{F_1 - W'_2 \mathcal{J}'_2}{W'_1}, \mathcal{J}'_2 = \frac{W'_1 W_5}{W'_1 W_4 - W'_2 W_3} \mathcal{J}'_3 + \frac{W'_1 W_6}{W'_1 W_4 - W'_2 W_3} \mathcal{J}'_4 - \frac{W_3 F_1}{W'_1 W_4 - W'_2 W_3},$$

211 where  $W'_1 = \exp\left(\frac{r_{wD}}{2\lambda}\right) A_i(y_w)$ ,  $W'_2 = \exp\left(\frac{r_{wD}}{2\lambda}\right) B_i(y_w)$ ,  $\mathcal{J}'_3 = \frac{W_{13}W_{15} - W_{12}W_{16}}{W_{11}W_{16} - W_{13}W_{14}} \mathcal{J}'_4$ , and  $\mathcal{J}'_4 =$

$$212 \quad \frac{W_3 F_1 (W'_1 W_8 - W'_2 W_7) - W_7 F_1 (W'_1 W_4 - W'_2 W_3)}{(W'_1 W_5 \Theta + W'_1 W_6) (W'_1 W_8 - W'_2 W_7) - (W'_1 W_9 \Theta - W'_1 W_{10}) (W'_1 W_4 - W'_2 W_3)}.$$

213 Substituting  $\mathcal{J}'_1$  and  $\mathcal{J}'_2$  into Eq. (B7a), one has

$$214 \quad \bar{C}_{inj,D}(r_{wD}, s) = \mathcal{J}'_1 \exp\left(\frac{r_D}{2\lambda}\right) A_i(y_1) + \mathcal{J}'_2 \exp\left(\frac{r_D}{2\lambda}\right) B_i(y_1), \quad (\text{B15})$$

215 In the chasing phase, the values of  $\mathcal{J}_1$  and  $\mathcal{J}_2$  are changed into  $\mathcal{J}''_1$  and  $\mathcal{J}''_2$  as follows

$$216 \quad \mathcal{J}''_1 = \frac{F_2 - W'_2 \mathcal{J}''_2}{W'_1}, \mathcal{J}''_2 = \frac{W'_1 W_5}{W'_1 W_4 - W'_2 W_3} \mathcal{J}''_3 + \frac{W'_1 W_6}{W'_1 W_4 - W'_2 W_3} \mathcal{J}''_4 - \frac{W_3 F_2}{W'_1 W_4 - W'_2 W_3},$$

217 where  $\mathcal{J}_3'' = \frac{W_{13}W_{15}-W_{12}W_{16}}{W_{11}W_{16}-W_{13}W_{14}} \mathcal{J}_4''$ ,  $\mathcal{J}_4'' = \frac{W_3F_2(W_1'W_8-W_2'W_7)-W_7F_2(W_1'W_4-W_2'W_3)}{(W_1'W_5\Theta+W_1'W_6)(W_1'W_8-W_2'W_7)-(W_1'W_9\Theta-W_1'W_{10})(W_1'W_4-W_2'W_3)}$ .

218 Substituting  $\mathcal{J}_1''$  and  $\mathcal{J}_2''$  into Eq. (B10a), one has

219  $\bar{C}_{cha,D}(r_{wD}, s) = \mathcal{J}_1'' \exp\left(\frac{r_D}{2\lambda}\right) A_i(y_1) + \mathcal{J}_2'' \exp\left(\frac{r_D}{2\lambda}\right) B_i(y_1)$ , (B16)

220 Substituting Eqs. (B7a) - (B7c) into Eq. (A1b) and Eq. (A1d), one has

221  $\bar{C}_{im1D} = \frac{\varepsilon_{im1}}{s+\varepsilon_{im1}+\mu_{im1D}} \bar{C}_{m1D}$ ,  $r_{wD} \leq r_D \leq r_{sD}$ , (B17a)

222  $\bar{C}_{im2D} = \frac{\varepsilon_{im2}}{s+\varepsilon_{im2}+\mu_{im2D}} \bar{C}_{m2D}$ ,  $r_D > r_{sD}$ . (B17b)

### 223 S3. The MIM model and solution in an aquifer-aquitard system

#### 224 S3.1 Mathematical model

225 Assuming that advection, dispersion and sorption involved in the solute transport in the  
226 aquifer-aquitard system, the governing equations are

227  $\theta_{m1}R_{m1} \frac{\partial C_{m1}}{\partial t} = \frac{\theta_{m1}}{r} \frac{\partial}{\partial r} \left( r\alpha_1|v_{a1}| \frac{\partial C_{m1}}{\partial r} \right) - \theta_{m1}v_{a1} \frac{\partial C_{m1}}{\partial r} - \omega_1(C_{m1} - C_{im1})$   
228  $-\theta_{m1}\mu_{m1}C_{m1} - \frac{\theta_{um}D_u}{2b} \frac{\partial C_{um}}{\partial z} \Big|_{z=b} + \frac{\theta_{lm}D_l}{2b} \frac{\partial C_{lm}}{\partial z} \Big|_{z=-b}$ ,  $r_w \leq r \leq r_s$ , (C1a)

229  $\theta_{im1}R_{im1} \frac{\partial C_{im1}}{\partial t} = \omega_1(C_{m1} - C_{im1}) - \theta_{im1}\mu_{im1}C_{im1}$ ,  $r_w \leq r \leq r_s$ , (C1b)

230  $\theta_{m2}R_{m2} \frac{\partial C_{m2}}{\partial t} = \frac{\theta_{m2}}{r} \frac{\partial}{\partial r} \left( r\alpha_2|v_{a2}| \frac{\partial C_{m2}}{\partial r} \right) - \theta_{m2}v_{a2} \frac{\partial C_{m2}}{\partial r} - \omega_2(C_{m2} - C_{im2})$   
231  $-\theta_{m2}\mu_{m2}C_{m2} - \frac{\theta_{um}D_u}{2b} \frac{\partial C_{um}}{\partial z} \Big|_{z=b} + \frac{\theta_{lm}D_l}{2b} \frac{\partial C_{lm}}{\partial z} \Big|_{z=-b}$ ,  $r > r_s$ , (C1c)

232  $\theta_{im2}R_{im2} \frac{\partial C_{im2}}{\partial t} = \omega_2(C_{m2} - C_{im2}) - \theta_{im2}\mu_{im2}C_{im2}$ ,  $r > r_s$ , (C1d)

233  $\theta_{um}R_{um} \frac{\partial C_{um}}{\partial t} = \theta_{um}D_u \frac{\partial^2 C_{um}}{\partial z^2} - \omega_u(C_{um} - C_{uim}) - \theta_{um}\mu_{um}C_{um}$ ,  $z \geq b$ , (C2a)

234  $\theta_{uim}R_{uim} \frac{\partial C_{uim}}{\partial t} = \omega_u(C_{um} - C_{uim}) - \theta_{uim}\mu_{uim}C_{uim}$ ,  $z \geq b$  (C2b)

235  $\theta_{lm}R_{lm} \frac{\partial C_{lm}}{\partial t} = \theta_{lm}D_l \frac{\partial^2 C_{lm}}{\partial z^2} - \omega_l(C_{lm} - C_{lim}) - \theta_{lm}\mu_{lm}C_{lm}$ ,  $z \leq -b$ , (C3a)

$$236 \quad \theta_{lim} R_{lim} \frac{\partial C_{lim}}{\partial t} = \omega_l (C_{lm} - C_{lim}) - \theta_{lim} \mu_{lim} C_{lim}, z \leq -b, \quad (C3b)$$

237 where the subscripts “u” and “l” refer to the parameters in the upper and lower aquitard,  
 238 respectively; the subscripts “m” and “im” refer to the parameters in the mobile and immobile  
 239 regions, respectively; the subscripts “1” and “2” refer to the parameters in the skin and  
 240 formation regions, respectively;  $C_{m1}$  and  $C_{im1}$  are the mobile and immobile concentrations [ML<sup>-3</sup>]  
 241 of the skin zone, respectively;  $C_{m2}$  and  $C_{im2}$  are the mobile and immobile concentrations [ML<sup>-3</sup>]  
 242 of the formation zone, respectively;  $C_{um}$  and  $C_{uim}$  are the mobile and immobile concentrations  
 243 [ML<sup>-3</sup>] of the upper aquitard, respectively;  $C_{lm}$  and  $C_{lim}$  are the mobile and immobile  
 244 concentrations [ML<sup>-3</sup>] of the upper aquitard, respectively;  $t$  is time [T];  $r$  is the radial distance [L]  
 245 from the center of the well;  $r_w$  is radius of the well [L];  $r_s$  is the radial distance [L] from the  
 246 center of the well to the outer radius of the skin zone;  $z$  represents the vertical distance [L];  $b$  is  
 247 the half of the aquifer thickness [L];  $\alpha_1$  and  $\alpha_2$  represent the longitudinal dispersivities [L] in the  
 248 skin and formation zones, respectively;  $D_u$  and  $D_l$  are the vertical dispersion coefficients [L<sup>2</sup>T<sup>-1</sup>]  
 249 of the upper and lower aquitards, respectively;  $v_{a1}$  and  $v_{a2}$  represent the average radial pore  
 250 velocity [LT<sup>-1</sup>] of the skin and formation zones, respectively; and  $v_{a1} = \frac{u_1}{\theta_{m1}}$  and  $v_{a1} = \frac{u_2}{\theta_{m2}}$ ;  $u_1$   
 251 and  $u_2$  represent Darcian velocity [LT<sup>-1</sup>] of the skin and formation zones, respectively;  $\mu_{m1}, \mu_{im1},$   
 252  $\mu_{m2}, \mu_{im2}, \mu_{um}, \mu_{uim}, \mu_{lm}$  and  $\mu_{lim}$  are reaction rates for first-order biodegradation, or  
 253 radioactive decay, or the first-order reaction rate [T<sup>-1</sup>], respectively;  $\theta_{m1}, \theta_{im1}, \theta_{m2}$  and  $\theta_{im2}$   
 254 are the mobile and immobile porosities [dimensionless], respectively;  $\theta_{um}, \theta_{uim}, \theta_{lm}$  and  $\theta_{lim}$   
 255 are the mobile and immobile porosities [dimensionless], respectively;  $R_{m1} = 1 + \frac{\rho_b K_d}{\theta_{m1}}$  and  
 256  $R_{im1} = 1 + \frac{\rho_b K_d}{\theta_{im1}}$  are regarded as retardation factors [dimensionless] for the mobile and immobile  
 257 regions of the skin zone, respectively;  $R_{m2} = 1 + \frac{\rho_b K_d}{\theta_{m2}}$  and  $R_{im2} = 1 + \frac{\rho_b K_d}{\theta_{im2}}$  are regarded as

258 retardation factors [dimensionless] for the mobile and immobile regions of the aquifer,  
 259 respectively;  $R_{um} = 1 + \frac{\rho_b K_d}{\theta_{um}}$  and  $R_{uim} = 1 + \frac{\rho_b K_d}{\theta_{uim}}$  are regarded as retardation factors  
 260 [dimensionless] for the mobile and immobile regions of the upper aquitard, respectively;  $R_{lm} =$   
 261  $1 + \frac{\rho_b K_d}{\theta_{lm}}$  and  $R_{lim} = 1 + \frac{\rho_b K_d}{\theta_{lim}}$  could be regarded as retardation factors [dimensionless] for the  
 262 mobile and immobile regions in the lower aquitard, respectively;  $K_d$  is the equilibrium  
 263 distribution coefficient for the linear sorption process [ $M^{-1}L^3$ ];  $\rho_b$  is the bulk density [ $ML^{-3}$ ] of  
 264 the aquifer material;  $\omega_a$ ,  $\omega_u$  and  $\omega_l$  are the first-order mass transfer coefficients [ $T^{-1}$ ] of the  
 265 aquifer, upper aquitard, and lower aquitard, respectively.

266 Subject to the following initial and boundary conditions

$$267 \quad C_{m1}(r, t)|_{t=0} = C_{im1}(r, t)|_{t=0} = C_{m2}(r, t)|_{t=0} = C_{im2}(r, t)|_{t=0} = C_{um}(r, z, t)|_{t=0} =$$

$$268 \quad C_{uim}(r, z, t)|_{t=0} = C_{lm}(r, z, t)|_{t=0} = C_{lim}(r, z, t)|_{t=0} = 0, r \geq r_w, \quad (C4)$$

$$269 \quad C_{m2}(r, t)|_{r \rightarrow \infty} = C_{im2}(r, t)|_{r \rightarrow \infty} = C_{um}(r, z, t)|_{r \rightarrow \infty} = C_{uim}(r, z, t)|_{r \rightarrow \infty} =$$

$$270 \quad C_{lm}(r, z, t)|_{r \rightarrow -\infty} = C_{lim}(r, z, t)|_{r \rightarrow -\infty} = 0, r \geq r_w, \quad (C5)$$

$$271 \quad C_{m1}(r, t) = C_{um}(r, z = b, t), r_w \leq r \leq r_s, \quad (C6a)$$

$$272 \quad C_{m2}(r, t) = C_{um}(r, z = b, t), r > r_s, \quad (C6b)$$

$$273 \quad C_{m1}(r, t) = C_{lm}(r, z = -b, t), r_w \leq r \leq r_s, \quad (C7a)$$

$$274 \quad C_{m2}(r, t) = C_{lm}(r, z = -b, t), r > r_s. \quad (C7b)$$

275 The flux concentration continuity is applied in boundary condition of the wellbore, and one  
 276 has

$$277 \quad \left[ v_{a1,inj} C_{m1}(r, t) - \alpha_1 |v_{a1,inj}| \frac{\partial C_{m1}(r, t)}{\partial r} \right] \Big|_{r=r_w} = [v_{a1,inj} C_{inj}(t)] \Big|_{r=r_w}, 0 < t \leq t_{inj}, \quad (C8a)$$

$$278 \quad \left[ v_{a1,cha} C_{m1}(r, t) - \alpha_1 |v_{a1,cha}| \frac{\partial C_{m1}(r, t)}{\partial r} \right] \Big|_{r=r_w} = [v_{a1,cha} C_{cha}(t)] \Big|_{r=r_w}, t > t_{inj}, \quad (C8b)$$

279 where  $C_{inj}(t)$  and  $C_{cha}(t)$  represent the wellbore concentrations  $[ML^{-3}]$  of tracer in the injection  
 280 and chasing phases, respectively.

281 Considering the mixing effect of the injected tracer with the original water in the wellbore,  
 282 the variations of concentration in the injection and chasing phases could be described as

$$283 \quad V_{w,inj} \frac{dC_{inj}}{dt} = -\xi v_{a1,inj}(r_w)[C_{inj}(t) - C_0], \quad 0 < t \leq t_{inj}, \quad (C9a)$$

$$284 \quad V_{w,cha} \frac{dC_{cha}}{dt} = -\xi v_{a1,cha}(r_w)[C_{cha}(t)], \quad t > t_{inj}. \quad (C9b)$$

### 285 **3.2 Derivation of the analytical solutions**

286 The dimensionless parameters are defined as:  $C_{m1D} = \frac{C_{m1}}{C_0}$ ,  $C_{im1D} = \frac{C_{im1}}{C_0}$ ,  $C_{m2D} = \frac{C_{m2}}{C_0}$ ,

$$287 \quad C_{im2D} = \frac{C_{im2}}{C_0}, \quad C_{wD} = \frac{C_w}{C_0}, \quad C_{inj,D} = \frac{C_{inj}}{C_0}, \quad C_{cha,D} = \frac{C_{cha}}{C_0}, \quad C_{umD} = \frac{C_{um}}{C_0}, \quad C_{uimD} = \frac{C_{uim}}{C_0}, \quad C_{lmD} = \frac{C_{lm}}{C_0},$$

$$288 \quad C_{limD} = \frac{C_{lim}}{C_0}, \quad t_D = \frac{|A|t}{\alpha_2^2 R_{m1}}, \quad t_{inj,D} = \frac{|A|t_{inj}}{\alpha_2^2 R_{m1}}, \quad r_D = \frac{r}{\alpha_2}, \quad r_{wD} = \frac{r_w}{\alpha_2}, \quad z_D = \frac{z}{B}, \quad \mu_{m1D} = \frac{\alpha_2^2 \mu_{m1}}{A}, \quad \mu_{im1D} =$$

$$289 \quad \frac{\alpha_2^2 R_{m1} \mu_{im1}}{R_{im1} A}, \quad \mu_{m2D} = \frac{\alpha_2^2 \mu_{m2}}{A}, \quad \mu_{im2D} = \frac{\alpha_2^2 R_{m1} \mu_{im2}}{R_{im2} A}, \quad \mu_{umD} = \frac{\alpha_2^2 R_m \mu_m}{R_{um} A}, \quad \mu_{uimD} = \frac{\alpha_2^2 R_m \mu_{im}}{R_{um} A}, \quad \mu_{lmD} =$$

$$290 \quad \frac{\alpha_2^2 R_m \mu_m}{A R_{lm}}, \quad \mu_{limD} = \frac{\alpha_2^2 R_m \mu_{im}}{R_{lm} A} \text{ and } A = \frac{Q}{4\pi B \theta_{m1}}. \text{ The dimensionless forms of the governing equation}$$

291 could be rewritten as

$$292 \quad \frac{\partial C_{m1D}}{\partial t_D} = \frac{\lambda}{r_D} \frac{\partial^2 C_{m1D}}{\partial r_D^2} - \frac{1}{r_D} \frac{\partial C_{m1D}}{\partial r_D} - \varepsilon_{m1}(C_{m1D} - C_{im1D}) - \mu_{m1D} C_{m1D} - \frac{\theta_{um} \alpha_2^2 D_u}{2A \theta_{m1} b^2} \frac{\partial C_{umD}}{\partial z_D} \Big|_{z=1} +$$

$$293 \quad \frac{\theta_{lm} \alpha_2^2 D_l}{2A b^2 \theta_{m1}} \frac{\partial C_{lmD}}{\partial z_D} \Big|_{z=-1}, \quad r_{wD} \leq r_D \leq r_{SD}, \quad (C10a)$$

$$294 \quad \frac{\partial C_{im1D}}{\partial t_D} = \varepsilon_{im1}(C_{m1D} - C_{im1D}) - \mu_{im1D} C_{im1D}, \quad r_{wD} \leq r_D \leq r_{SD}, \quad (C10b)$$

$$295 \quad \frac{\partial C_{m2D}}{\partial t_D} = \frac{1}{r_D} \frac{\partial^2 C_{m2D}}{\partial r_D^2} - \frac{1}{r_D} \frac{\partial C_{m2D}}{\partial r_D} - \varepsilon_{m2}(C_{m2D} - C_{im2D}) - \mu_{m2D} C_{m2D} - \frac{\theta_{um} \alpha_2^2 D_u}{2A \theta_{m2} b^2} \frac{\partial C_{umD}}{\partial z_D} \Big|_{z=1} +$$

$$296 \quad \frac{\theta_{lm} \alpha_2^2 D_l}{2A b^2 \theta_{m2}} \frac{\partial C_{lmD}}{\partial z_D} \Big|_{z=-1}, \quad r_D > r_{SD}, \quad (C10c)$$

$$297 \quad \frac{\partial C_{im2D}}{\partial t_D} = \varepsilon_{im2}(C_{m2D} - C_{im2D}) - \mu_{im2D} C_{im2D}, \quad r_D > r_{SD}, \quad (C10d)$$

$$298 \quad \frac{\partial C_{umD}}{\partial t_D} = \frac{R_{m1}\alpha_2^2 D_u}{Ab^2 R_{um}} \frac{\partial^2 C_{umD}}{\partial z_D^2} - \varepsilon_{um}(C_{umD} - C_{uimD}) - \mu_{umD} C_{umD, Z_D} \geq 1, t_D > 0, \quad (C11a)$$

$$299 \quad \frac{\partial C_{uimD}}{\partial t_D} = \varepsilon_{uim}(C_{umD} - C_{uimD}) - \mu_{uimD} C_{uimD, Z_D} \geq 1, t_D > 0 \quad (C11b)$$

$$300 \quad \frac{\partial C_{lmD}}{\partial t_D} = \frac{R_{m1}\alpha_2^2 D_l}{Ab^2 R_{lm}} \frac{\partial^2 C_{lmD}}{\partial z_D^2} - \varepsilon_{lm}(C_{lmD} - C_{limD}) - \mu_{lmD} C_{lmD, Z_D} \leq -1, t_D > 0, \quad (C12a)$$

$$301 \quad \frac{\partial C_{limD}}{\partial t_D} = \varepsilon_{lim}(C_{lmD} - C_{limD}) - \mu_{limD} C_{limD, Z_D} \leq -1, t_D > 0, \quad (C12b)$$

$$302 \quad \text{where } \varepsilon_{m1} = \frac{\omega_1 \alpha_2^2}{A\theta_{m1}}, \varepsilon_{im1} = \frac{\omega_1 \alpha_2^2 R_{m1}}{A\theta_{im1} R_{im1}}, \varepsilon_{m2} = \frac{\omega_2 \alpha_2^2}{A\theta_{m2}}, \varepsilon_{im2} = \frac{\omega_2 \alpha_2^2 R_{m1}}{A\theta_{im2} R_{im2}}, \varepsilon_{um} = \frac{\omega_u \alpha_2^2 R_{m1}}{A\theta_{um} R_{um}}, \varepsilon_{uim} =$$

$$303 \quad \frac{\omega_u \alpha_2^2 R_{m1}}{A\theta_{uim} R_{uim}}, \varepsilon_{lm} = \frac{\omega_l \alpha_2^2 R_{m1}}{A\theta_{lm} R_{lm}}, \varepsilon_{lim} = \frac{\omega_l \alpha_2^2 R_{m1}}{A\theta_{lim} R_{lim}}.$$

304 Substituting the dimensionless parameters into Eqs. (C4) - (C7), one has

$$305 \quad C_{m1D}(r_D, t_D)|_{t_D=0} = C_{im1D}(r_D, t_D)|_{t_D=0} = C_{m2D}(r_D, t_D)|_{t_D=0} = C_{im2D}(r_D, t_D)|_{t_D=0} =$$

$$306 \quad C_{umD}(r_D, Z_D, t_D)|_{t_D=0} = C_{uimD}(r_D, Z_D, t_D)|_{t_D=0} = C_{lmD}(r_D, Z_D, t_D)|_{t_D=0} =$$

$$307 \quad C_{limD}(r_D, Z_D, t_D)|_{t_D=0} = 0, \quad (C13)$$

$$308 \quad C_{m2D}(r_D, t_D)|_{r_D \rightarrow \infty} = C_{im2D}(r_D, t_D)|_{r_D \rightarrow \infty} = C_{umD}(r_D, Z_D, t_D)|_{Z_D \rightarrow \infty} =$$

$$309 \quad C_{uimD}(r_D, Z_D, t_D)|_{Z_D \rightarrow \infty} = C_{lmD}(r_D, Z_D, t)|_{Z_D \rightarrow -\infty} = C_{limD}(r_D, Z_D, t_D)|_{Z_D \rightarrow -\infty} = 0, \quad (C14)$$

$$310 \quad C_{m1D}(r_D, t_D) = C_{umD}(r_D, Z_D = 1, t_D), r_{wD} \leq r_D \leq r_{sD}, \quad (C15a)$$

$$311 \quad C_{m2D}(r_D, t_D) = C_{umD}(r_D, Z_D = 1, t_D), r_{wD} \leq r_D \leq r_{sD}, \quad (C15b)$$

$$312 \quad C_{m2D}(r_D, t_D) = C_{lmD}(r_D, Z_D = -1, t_D), r_D > r_{sD}, \quad (C15c)$$

$$313 \quad C_{m2D}(r_D, t_D) = C_{lmD}(r_D, Z_D = -1, t_D), r_D > r_{sD}. \quad (C15d)$$

314 Conducting Laplace transform to Eqs. (C11a) - (C11b), one has:

$$315 \quad s\bar{C}_{umD} = \frac{R_{m1}\alpha_2^2 D_u}{AB^2 R_{um}} \frac{\partial^2 \bar{C}_{umD}}{\partial z_D^2} - (\varepsilon_{um} + \mu_{umD})\bar{C}_{umD} + \varepsilon_{um}\bar{C}_{uimD, Z_D} \geq 1, \quad (C16a)$$

$$316 \quad s\bar{C}_{uimD} = \varepsilon_{uim}(\bar{C}_{umD} - \bar{C}_{uimD}) - \mu_{uimD}\bar{C}_{uimD, Z_D} \geq 1. \quad (C16b)$$

317 Substituting Eq. (C16b) into Eq. (C16a), Eq. (C16a) could be rewritten as



$$318 \quad \frac{R_{m1}\alpha_2^2 D_u}{Ab^2 R_{um}} \frac{\partial^2 \bar{C}_{umD}}{\partial z_D^2} - \left( s + \varepsilon_{um} + \mu_{umD} - \frac{\varepsilon_{um}\varepsilon_{uim}}{s+\mu_{uimD}+\varepsilon_{uim}} \right) \bar{C}_{umD} = 0, z_D \geq 1. \quad (C17)$$

319 Similarly, Eqs. (C12a) - (C12b) become:

$$320 \quad \frac{R_{m1}\alpha_2^2 D_l}{Ab^2 R_{lm}} \frac{\partial^2 \bar{C}_{lmD}}{\partial z_D^2} - \left( s + \varepsilon_{lm} + \mu_{lmD} - \frac{\varepsilon_{lm}\varepsilon_{lim}}{s+\mu_{limD}+\varepsilon_{lim}} \right) \bar{C}_{lmD} = 0, z_D \leq -1. \quad (C18)$$

321 Eqs. (C13) - (C15d) and Eq. (C17) compose a model of the second-order ordinary  
 322 differential equation (ODE) with boundary conditions, and the general solution of the Eq. (C17)  
 323 is

$$324 \quad \bar{C}_{umD} = A_1 e^{a_1 z_D} + B_1 e^{a_2 z_D}, z_D \geq 1. \quad (C19a)$$

325 Similarly, the general solution of Eq. (C18) is

$$326 \quad \bar{C}_{lmD} = A_2 e^{b_1 z_D} + B_2 e^{b_2 z_D}, z_D \leq -1, \quad (C19b)$$

$$327 \quad \text{where } a_1 = \sqrt{s + \varepsilon_{um} + \mu_{umD} - \frac{\varepsilon_{um}\varepsilon_{uim}}{s+\mu_{uimD}+\varepsilon_{uim}}}, a_2 = -\sqrt{s + \varepsilon_{um} + \mu_{umD} - \frac{\varepsilon_{um}\varepsilon_{uim}}{s+\mu_{uimD}+\varepsilon_{uim}}}, b_1 =$$

$$328 \quad \sqrt{s + \varepsilon_{lm} + \mu_{lmD} - \frac{\varepsilon_{lm}\varepsilon_{lim}}{s+\mu_{limD}+\varepsilon_{lim}}} \text{ and } b_2 = -\sqrt{s + \varepsilon_{lm} + \mu_{lmD} - \frac{\varepsilon_{lm}\varepsilon_{lim}}{s+\mu_{limD}+\varepsilon_{lim}}}.$$

329 Substituting Eqs. (C19a) - (C19b) into Eqs. (C15a) - (C15d), one has

$$330 \quad \bar{C}_{umD} = B_1 e^{a_2 z_D}, z_D \geq 1, \quad (C20a)$$

$$331 \quad \bar{C}_{lmD} = A_2 e^{b_1 z_D}, z_D \leq -1, \quad (C20b)$$

332 where  $B_1 = \bar{C}_{mD} \exp(-a_2)$ ,  $B_2 = 0$ ,  $A_1 = 0$  and  $A_2 = \bar{C}_{mD} \exp(b_1)$ .

333 Thus, the solutions of the aquitards are

$$334 \quad \bar{C}_{umD} = \bar{C}_{m1D} \exp(a_2 z_D - a_2), r_{wD} \leq r_D \leq r_{sD}, \quad (C3a)$$

$$335 \quad \bar{C}_{umD} = \bar{C}_{m2D} \exp(a_2 z_D - a_2), r_D > r_{sD}, \quad (C21b)$$

$$336 \quad \bar{C}_{uimD} = \frac{\varepsilon_{uim}}{s+\varepsilon_{uim}+\mu_{uimD}} \bar{C}_{umD}, r_D \geq r_{wD}, \quad (C21c)$$

$$337 \quad \bar{C}_{lmD} = \bar{C}_{m1D} \exp(b_1 z_D + b_1), r_{wD} \leq r_D \leq r_{sD}, \quad (C22a)$$

$$338 \quad \bar{C}_{lmD} = \bar{C}_{m2D} \exp(b_1 z_D + b_1), r_D > r_{sD}, \quad (C22b)$$

$$339 \quad \bar{C}_{limD} = \frac{\varepsilon_{lim}}{s + \varepsilon_{lim} + \mu_{limD}} \bar{C}_{lmD}, r_D \geq r_{wD}, \quad (C22c)$$

340 The dimensionless forms of Eqs. (C8a) - (C9b) become

$$341 \quad \left[ C_{m1D} - \lambda \frac{\partial C_{m1D}(r_D, t_D)}{\partial r_D} \right] \Big|_{r=r_{wD}} = C_{inj,D}(t_D), 0 < t_D \leq t_{inj,D}, \quad (C23a)$$

$$342 \quad \left[ C_{m1D} - \lambda \frac{\partial C_{m1D}(r_D, t_D)}{\partial r_D} \right] \Big|_{r=r_{wD}} = C_{cha,D}(t_D), t_D > t_{inj,D}, \quad (C23b)$$

$$343 \quad \beta_{inj} \frac{dC_{inj,D}(t_D)}{dt_D} = 1 - C_{inj,D}(t_D), 0 < t_D \leq t_{inj,D}, \quad (C24a)$$

$$344 \quad \beta_{cha} \frac{dC_{cha,D}(t_D)}{dt_D} = -C_{cha,D}(t_D), t_D > t_{inj,D}, \quad (C24b)$$

$$345 \quad \text{where } \beta_{inj} = \frac{V_{w,inj} r_{wD}}{\xi R_m \alpha_2} \text{ and } \beta_{cha} = \frac{V_{w,cha} r_{wD}}{\xi R_m \alpha_2}.$$

346 After applying Laplace transform to Eqs. (C10a) - (C10b), one has

$$347 \quad s \bar{C}_{m1D} = \frac{\lambda}{r_D} \frac{\partial^2 \bar{C}_{m1D}}{\partial r_D^2} - \frac{1}{r_D} \frac{\partial \bar{C}_{m1D}}{\partial r_D} - \varepsilon_{m2} (\bar{C}_{m1D} - \bar{C}_{im1D}) - \mu_{m1D} \bar{C}_{m1D} - \frac{\theta_{um} \alpha_2^2 D_u}{2A \theta_{m1} b^2} \frac{\partial \bar{C}_{umD}}{\partial z_D} \Big|_{z=1} +$$

$$348 \quad \frac{\theta_{lm} \alpha_2^2 D_l}{2Ab^2 \theta_{m1}} \frac{\partial \bar{C}_{lmD}}{\partial z_D} \Big|_{z=-1}, r_{wD} \leq r_D \leq r_{sD}, \quad (C25a)$$

$$349 \quad s \bar{C}_{im1D} = \varepsilon_{im2} (\bar{C}_{m1D} - \bar{C}_{im1D}) - \mu_{im1D} \bar{C}_{im1D}, r_{wD} \leq r_D \leq r_{sD}. \quad (C25b)$$

350 Substituting Eq. (C25b) into Eq. (C25a), Eq. (C25a) could be rewritten as

$$351 \quad \frac{\lambda}{r_D} \frac{\partial^2 \bar{C}_{m1D}}{\partial r_D^2} - \frac{1}{r_D} \frac{\partial \bar{C}_{m1D}}{\partial r_D} - \left( \varepsilon_{m1} + \mu_{m1D} - \frac{\varepsilon_{m1} \varepsilon_{im1}}{s + \mu_{im1D} + \varepsilon_{im1}} \right) \bar{C}_{m1D} - \frac{\theta_{um} \alpha_2^2 D_u}{2A \theta_{m1} b^2} \frac{\partial \bar{C}_{umD}}{\partial z_D} \Big|_{z=1} +$$

$$352 \quad \frac{\theta_{lm} \alpha_2^2 D_l}{2Ab^2 \theta_{m1}} \frac{\partial \bar{C}_{lmD}}{\partial z_D} \Big|_{z=-1}, r_{wD} \leq r_D \leq r_{sD}. \quad (C26)$$

353 After applying Laplace transform to Eqs. (C10c) - (C10d), the following equations would be

354 obtained

$$355 \quad s \bar{C}_{m2D} = \frac{\eta}{r_D} \frac{\partial^2 \bar{C}_{m2D}}{\partial r_D^2} - \frac{\eta}{r_D} \frac{\partial \bar{C}_{m2D}}{\partial r_D} - \varepsilon_{m2} (C_{m2D} - C_{im2D}) - \frac{\theta_{um} \alpha_2^2 D_u}{2A \theta_{m2} b^2} \frac{\partial \bar{C}_{umD}}{\partial z_D} \Big|_{z=1} +$$

$$356 \quad \frac{\theta_{lm} \alpha_2^2 D_l}{2Ab^2 \theta_{m2}} \frac{\partial \bar{C}_{lmD}}{\partial z_D} \Big|_{z=-1}, r_D > r_{sD}, \quad (C27a)$$

$$357 \quad s \bar{C}_{im2D} = \varepsilon_{im2} (\bar{C}_{m2D} - \bar{C}_{im2D}) - \mu_{im2D} \bar{C}_{im2D}, r_D > r_{sD}. \quad (C27b)$$

358 Substituting Eq. (C27b) into Eq. (C27a), one has

$$359 \quad s\bar{C}_{m2D} = \frac{\eta}{r_D} \frac{\partial^2 \bar{C}_{m2D}}{\partial r_D^2} - \frac{\eta}{r_D} \frac{\partial \bar{C}_{m2D}}{\partial r_D} - \left( \varepsilon_{m2} + \mu_{m2D} - \frac{\varepsilon_{m2}\varepsilon_{im2}}{s+\mu_{im2D}+\varepsilon_{im2}} \right) \bar{C}_{m2D} -$$

$$360 \quad \frac{\theta_{um}\alpha_2^2 D_u}{2A\theta_{m2}b^2} \frac{\partial \bar{C}_{umD}}{\partial z_D} \Big|_{z=1} + \frac{\theta_{lm}\alpha_2^2 D_l}{2Ab^2\theta_{m2}} \frac{\partial \bar{C}_{lmD}}{\partial z_D} \Big|_{z=-1}, r_D > r_{SD}. \quad (C28)$$

361 Substituting Eq. (C21a) and Eq. (C22a) into Eq. (C26), one has

$$362 \quad \frac{\lambda}{r_D} \frac{\partial^2 \bar{C}_{m1D}}{\partial r_D^2} - \frac{1}{r_D} \frac{\partial \bar{C}_{m1D}}{\partial r_D} - E_3 \bar{C}_{m1D} = 0, r_{wD} \leq r_D \leq r_{SD}, \quad (C29a)$$

363 Substituting Eq. (C21b) and Eq. (C22b) into Eq. (C28), one has

$$364 \quad \frac{1}{r_D} \frac{\partial^2 \bar{C}_{m2D}}{\partial r_D^2} - \frac{1}{r_D} \frac{\partial \bar{C}_{m2D}}{\partial r_D} - E_4 \bar{C}_{m2D} = 0, r_D > r_{SD}, \quad (C29b)$$

365 where  $E_3 = s + \varepsilon_{m1} + \mu_{m1D} - \frac{\varepsilon_{m1}\varepsilon_{im1}}{s+\mu_{im1D}+\varepsilon_{im1}} - \frac{a_2\theta_{um}\alpha_2^2 D_u}{2A\theta_{m1}b^2} + \frac{b_1\theta_{lm}\alpha_2^2 D_l}{2Ab^2\theta_{m1}}$  and  $E_4 = \frac{1}{\eta} \left( s + \varepsilon_{m2} +$

$$366 \quad \mu_{m2D} - \frac{\varepsilon_{m2}\varepsilon_{im2}}{s+\mu_{im2D}+\varepsilon_{im2}} - \frac{a_2\theta_{um}\alpha_2^2 D_u}{2A\theta_{m2}b^2} + \frac{b_1\theta_{lm}\alpha_2^2 D_l}{2Ab^2\theta_{m2}} \right).$$

367 The boundary conditions of the wellbore and infinity in the Laplace domain are

$$368 \quad \left[ \bar{C}_{m1D} - \lambda \frac{\partial \bar{C}_{m1D}(r_D, s)}{\partial r_D} \right] \Big|_{r_D=r_{wD}} = \frac{1}{s(s\beta_{inj}+1)}, 0 < t_D \leq t_{inj,D}, \quad (C30a)$$

$$369 \quad \left[ \bar{C}_{m1D} - \lambda \frac{\partial \bar{C}_{m1D}(r_D, s)}{\partial r_D} \right] \Big|_{r_D=r_{wD}} = \frac{\beta_{cha}c_{inj,D}(r_{wD}, t_{inj,D})}{(s\beta_{cha}+1)}, t_D > t_{inj,D}, \quad (C30b)$$

$$370 \quad \bar{C}_{m1D}(r_{SD}, s) = \bar{C}_{m2D}(r_{SD}, s), \quad (C30c)$$

$$371 \quad \lambda \frac{\partial \bar{C}_{m1D}(r_D, s)}{\partial r_D} \Big|_{r_D=r_{SD}} = \frac{\partial \bar{C}_{m2D}(r_D, s)}{\partial r_D} \Big|_{r_D=r_{SD}}, \quad (C30d)$$

$$372 \quad \bar{C}_{m2D}(r_D, s) \Big|_{r_D \rightarrow \infty} = 0. \quad (C30e)$$

373 Therefore, the general solutions of Eq. (C30a) and Eq. (C30b) are

$$374 \quad \bar{C}_{m1D} = T_1 \exp\left(\frac{r_D}{2\lambda}\right) A_i(\varphi_1) + T_2 \exp\left(\frac{r_D}{2\lambda}\right) B_i(\varphi_1), r_{wD} \leq r_D \leq r_{SD}, \quad (C31a)$$

$$375 \quad \bar{C}_{m2D} = T_3 \exp\left(\frac{r_D}{2}\right) A_i(\varphi_2) + T_4 \exp\left(\frac{r_D}{2}\right) B_i(\varphi_2), r_D > r_{SD}, \quad (C31b)$$

376 where  $\varphi_1 = \left(\frac{E_3}{\lambda}\right)^{1/3} \left(r_D + \frac{1}{4\lambda E_3}\right)$ ,  $\varphi_2 = E_4^{1/3} \left(r_D + \frac{1}{4E_4}\right)$ ,  $T_1, T_2, T_3$  and  $T_4$  are constants which  
 377 could be determined by the boundary conditions.

378 Substituting Eq. (C31b) into Eq. (C30e), one has

$$379 \quad T_4 = 0. \quad (C32)$$

380 Substituting Eq. (C31a) into Eq. (C30a), one has

$$381 \quad T_1 \exp\left(\frac{r_{wD}}{2\lambda}\right) \left[ \frac{1}{2} A_i(\varphi_w) - \lambda \left(\frac{E_3}{\lambda}\right)^{1/3} A_i'(\varphi_w) \right] + T_2 \exp\left(\frac{r_{wD}}{2\lambda}\right) \left[ \frac{1}{2} B_i(\varphi_w) - \right. \\ 382 \quad \left. \lambda \left(\frac{E_3}{\lambda}\right)^{1/3} B_i'(\varphi_w) \right] = F_1. \quad (C33a)$$

383 Substituting Eq. (C31a) into Eq. (C30b), one has

$$384 \quad T_1 \exp\left(\frac{r_{wD}}{2\lambda}\right) \left[ \frac{1}{2} A_i(\varphi_w) - \lambda \left(\frac{E_4}{\lambda}\right)^{1/3} A_i'(\varphi_w) \right] + T_2 \exp\left(\frac{r_{wD}}{2\lambda}\right) \left[ \frac{1}{2} B_i(\varphi_w) - \right. \\ 385 \quad \left. \lambda \left(\frac{E_4}{\lambda}\right)^{1/3} B_i'(\varphi_w) \right] = F_2, \quad (C33b)$$

$$386 \quad \text{where } \varphi_w = \left(\frac{E_3}{\lambda}\right)^{1/3} \left(r_{wD} + \frac{1}{4\lambda E_3}\right), F_1 = \frac{1}{s(s\beta_{inj}+1)} \text{ and } F_2 = \frac{\beta_{cha} C_{inj,D}(r_{wD}, t_{inj,D})}{(s\beta_{cha}+1)}.$$

387 Substituting Eqs. (C31a) - (C31b) into Eq. (C30c), one has

$$388 \quad T_1 \exp\left(\frac{r_{sD}}{2\lambda}\right) A_i(\varphi_{1s}) + T_2 \exp\left(\frac{r_{sD}}{2\lambda}\right) B_i(\varphi_{1s}) = T_3 \exp\left(\frac{r_{sD}}{2}\right) A_i(\varphi_{2s}), \quad (C34)$$

$$389 \quad \text{where } \varphi_{1s} = \left(\frac{E_3}{\lambda}\right)^{1/3} \left(r_{sD} + \frac{1}{4\lambda E_3}\right), \varphi_{2s} = E_4^{1/3} \left(r_D + \frac{1}{4E_4}\right).$$

390 Substituting Eqs. (B31a) - (B31b) into Eq. (B30d), one has

$$391 \quad T_1 \exp\left(\frac{r_{sD}}{2\lambda}\right) \left[ \frac{1}{2} A_i(\varphi_{1s}) + \lambda \left(\frac{E_3}{\lambda}\right)^{1/3} A_i'(\varphi_{1s}) \right] + T_2 \exp\left(\frac{r_{sD}}{2\lambda}\right) \left[ \frac{1}{2} B_i(\varphi_{1s}) + \lambda \left(\frac{E_3}{\lambda}\right)^{1/3} B_i'(\varphi_{1s}) \right] = \\ 392 \quad T_3 \exp\left(\frac{r_{sD}}{2}\right) \left[ \frac{1}{2} A_i(\varphi_{2s}) + E_4^{1/3} A_i'(\varphi_{2s}) \right]. \quad (C35)$$

393 The values of  $T_1, T_2$ , and  $T_3$  could be determined by solving Eqs. (C33a) - (C35)

$$394 \quad T_1 = \frac{F - G_2 T_2}{G_1},$$

$$395 \quad T_2 = \frac{G_3 G_8 F - G_5 G_6 F}{G_1 G_5 G_7 + G_2 G_3 G_8 - G_2 G_5 G_6 - G_1 G_4 G_8}$$

$$396 \quad T_3 = \frac{G_3 F}{G_1 G_5} - \frac{G_2 G_3 T_2}{G_1 G_5} + \frac{G_4 T_2}{G_5},$$

$$397 \quad \text{where } G_1 = \exp\left(\frac{r_{wD}}{2\lambda}\right) \left[ \frac{1}{2} A_i(\varphi_w) - \lambda \left(\frac{E_3}{\lambda}\right)^{1/3} A_i'(\varphi_w) \right],$$

$$398 \quad G_2 = \exp\left(\frac{r_{wD}}{2\lambda}\right) \left[ \frac{1}{2} B_i(\varphi_w) - \lambda \left(\frac{E_3}{\lambda}\right)^{1/3} B_i'(\varphi_w) \right],$$

$$399 \quad G_3 = \exp\left(\frac{r_{sD}}{2\lambda}\right) A_i(\varphi_{1s}), G_4 = \exp\left(\frac{r_{sD}}{2\lambda}\right) B_i(\varphi_{1s}), G_5 = \exp\left(\frac{r_{sD}}{2}\right) A_i(\varphi_{2s}),$$

$$400 \quad G_6 = \exp\left(\frac{r_{sD}}{2\lambda}\right) \left[ \frac{1}{2} A_i(\varphi_{1s}) + \lambda \left(\frac{E_3}{\lambda}\right)^{1/3} A_i'(\varphi_{1s}) \right],$$

$$401 \quad G_7 = \exp\left(\frac{r_{sD}}{2\lambda}\right) \left[ \frac{1}{2} B_i(\varphi_{1s}) + \lambda \left(\frac{E_3}{\lambda}\right)^{1/3} B_i'(\varphi_{1s}) \right],$$

$$402 \quad G_8 = \exp\left(\frac{r_{sD}}{2}\right) \left[ \frac{1}{2} A_i(\varphi_{2s}) + E_4^{1/3} A_i'(\varphi_{2s}) \right],$$

$$403 \quad \text{and } F = C_{inj,D} \frac{1 - \exp(-t_{inj,DS})}{s} + C_{cha,D} \frac{\exp(-t_{inj,DS})}{s}.$$

404 In the injection phase, the values of  $T_1$  and  $T_2$  are modified into  $T_1'$  and  $T_2'$  as follows

$$405 \quad T_1' = \frac{F_1 - G_2' T_2'}{G_1'} \quad \text{and} \quad T_2' = \frac{G_3 G_8 F_1 - G_5 G_6 F_1}{G_1' G_5 G_7 + G_2' G_3 G_8 - G_2' G_5 G_6 - G_1' G_4 G_8},$$

$$406 \quad \text{where } G_1' = \frac{1}{2} \exp\left(\frac{r_{wD}}{2\lambda}\right) A_i(\varphi_w) \quad \text{and} \quad G_2' = \frac{1}{2} \exp\left(\frac{r_{wD}}{2\lambda}\right) B_i(\varphi_w).$$

407 Substituting  $T_1'$  and  $T_2'$  into Eq. (C31a), one has

$$408 \quad \bar{C}_{inj,D}(r_{wD}, s) = T_1' \exp\left(\frac{r_{wD}}{2\lambda}\right) A_i(\varphi_w) + T_2' \exp\left(\frac{r_{wD}}{2\lambda}\right) B_i(\varphi_w), \quad (C36)$$

409 In the chasing phase, the values of  $T_1$  and  $T_2$  are modified into  $T_1''$  and  $T_2''$  as follows

$$410 \quad T_1'' = \frac{F_2 - G_2' T_2''}{G_1''} \quad \text{and} \quad T_2'' = \frac{G_3 G_8 F_2 - G_5 G_6 F_2}{G_1'' G_5 G_7 + G_2' G_3 G_8 - G_2' G_5 G_6 - G_1'' G_4 G_8}.$$

411 Substituting  $T_1''$  and  $T_2''$  into Eq. (C31a), one has

$$412 \quad \bar{C}_{cha,D}(r_{wD}, s) = T_1'' \exp\left(\frac{r_{wD}}{2\lambda}\right) A_i(\varphi_w) + T_2'' \exp\left(\frac{r_{wD}}{2\lambda}\right) B_i(\varphi_w). \quad (C37)$$

413 Conducting Laplace transform on Eq. (A4c), one has

$$414 \quad \bar{C}_{wD}(r_{wD}, s) = C_{inj,D} \frac{1 - \exp(-t_{inj,DS})}{s} + C_{cha,D} \frac{\exp(-t_{inj,DS})}{s}, \quad (C38)$$

415 where  $C_{inj,D}$  and  $C_{cha,D}$  could be determined by Eqs. (C36) - (C37).

416 Substituting Eqs. (C31a) - (C31b) into Eqs. (C33a) - (C35) and Eq. (C38), one has

$$417 \quad \bar{C}_{m1D} = T_1 \exp\left(\frac{r_D}{2\lambda}\right) A_i(\varphi_1) + T_2 \exp\left(\frac{r_D}{2\lambda}\right) B_i(\varphi_1), r_{wD} < r_D \leq r_{SD}, \quad (C39a)$$

$$418 \quad \bar{C}_{m2D} = T_3 \exp\left(\frac{r_D}{2}\right) A_i(\varphi_2), r_D > r_{SD}. \quad (C39b)$$

#### 419 **S4. Numerical simulation by COMSOL Multiphysics**

420 In this study, the numerical simulation based on the Galerkin finite-element method is  
421 conducted in the COMSOL Multiphysics platform to test new solutions.

##### 422 ***S4.1 Models of Eqs. (14) – (15): Confined aquifer***

423 In our COMSOL simulation for the radial dispersion in a confined aquifer, triangles in the  
424  $r$ - $z$  plane are used as the elements, and it is easy to refine the elements near both the well and the  
425 skin-aquifer interfaces, as shown in Figure S2. The number of mesh points is 759, and the  
426 number of triangle elements is 1386. The time step increases linearly, and the initial time step is  
427 5s, with a total simulation time of 1000s. The parameters used in the numerical simulation  
428 are:  $r_w = 2.5\text{cm}$ ;  $r_s = 12.5\text{cm}$ ;  $Q_{inj} = Q_{cha} = 100\text{ml/s}$ ;  $t_{inj} = 300\text{s}$ ;  $\alpha_1 = 2.5\text{cm}$ ;  $\alpha_2 = 2.5\text{cm}$ ;  
429  $\theta_m = 0.30$ ;  $\theta_{im} = 0.01$ ;  $\omega = 0.0001 \text{ s}^{-1}$ ;  $R_{m1} = R_{im1} = R_{m2} = R_{im2} = 1$ ;  $B = 50 \text{ cm}$ ;  $\mu_{m1} =$   
430  $\mu_{m2} = \mu_{im1} = \mu_{im2} = 10^{-7} \text{ s}^{-1}$ , and  $h_{w,inj} = h_{w,cha} = B$ .

##### 431 ***S4.2 Models of Eqs. (19) – (20): Leaky-confined aquifer***

432 The temporal and spatial discretization of the aquifer in the numerical simulation is similar  
433 to the one used in Section S4.1. To decrease the numerical errors, the size of triangle cells is  
434 smaller around the aquifer-aquitard interface. The number of mesh points is 2885, and the

435 number of triangle elements is 5592. Figure 1 shows the comparison between the analytical and  
 436 numerical solutions, and the agreement is well. The parameters of the aquifers used in the  
 437 numerical simulation are from Section S4.1, while the others are:  $R_{um} = R_{uim} = R_{lm} = R_{lim} =$   
 438  $1$ ,  $\omega_u = \omega_l = 0.0001 \text{ s}^{-1}$ ,  $\theta_{um} = \theta_{lm} = 0.1$ ,  $\theta_{uim} = \theta_{lim} = 0.01$ ,  $\mu_{um} = \mu_{uim} = \mu_{lm} = \mu_{lim} =$   
 439  $10^{-7} \text{ s}^{-1}$ ,  $D_u = D_l = 0.0005 \text{ cm}^2/\text{s}$ .

440 **S5. The fitness of the experimental data by Chao (1999)**

441 Figures 4a and 4b show that the sensitivity of  $V_w$  on BTCs is the least. To answer the  
 442 question that if the influence of  $V_w$  could be ignored, we compare solutions of this study with and  
 443 without the mixing effect, and the experimental data are also included for the comparison, as  
 444 shown in Figure S4. The results show that two curves are almost the same. The reason is that the  
 445  $V_w$  is too small in the experiment of Chao (1999). Different sensitivity of  $V_w$  on BTCs has been  
 446 obtained for field applications in which  $V_w$  is significantly greater than that used by Chao (1999).

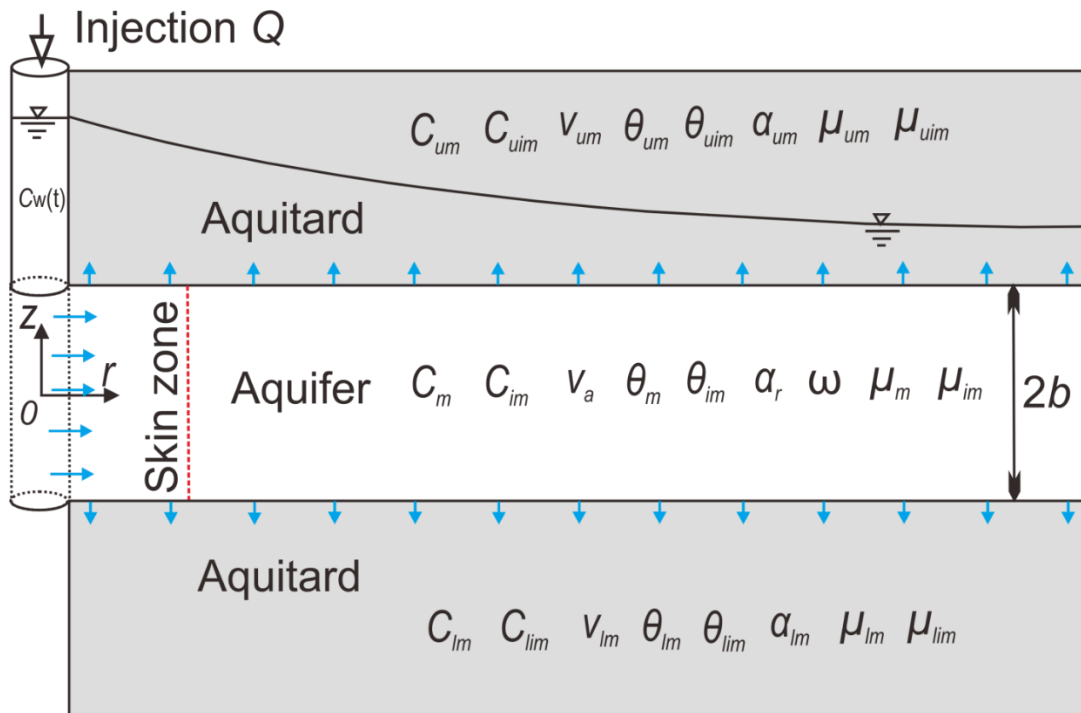

447  
 448 **Figure S1.** The schematic diagram of the radial dispersion in the aquifer-aquitard system.

449

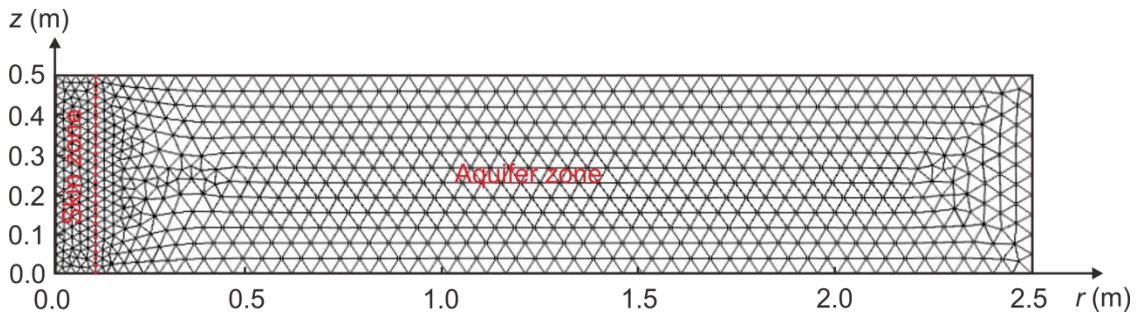

450

451 **Figure S2.** The grid mesh of the skin-aquifer system used in the Galerkin finite-element

452 COMSOL Multiphysics program.

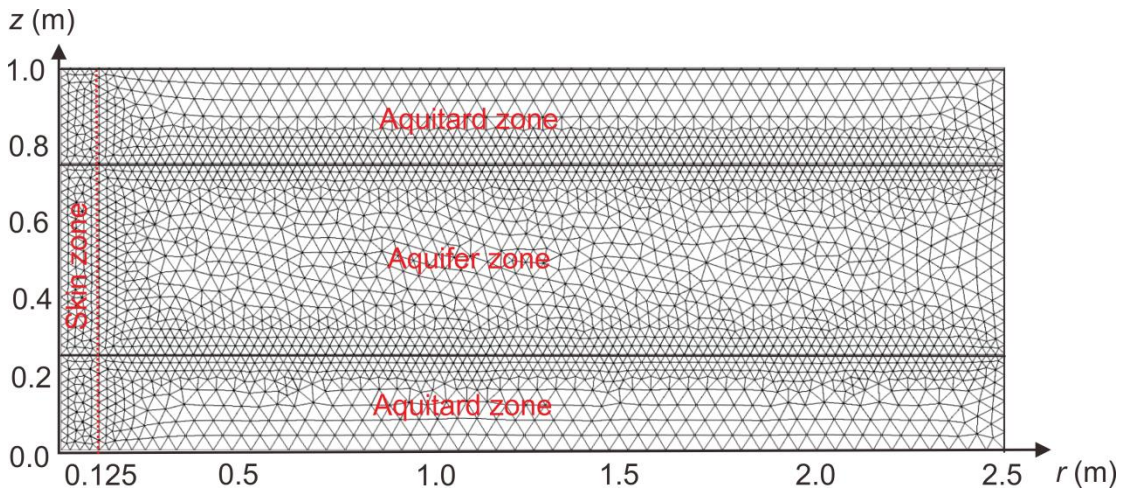

453

454 **Figure S3.** The grid mesh of the skin-aquifer-aquitard system used in the Galerkin finite-element

455 COMSOL Multiphysics program.



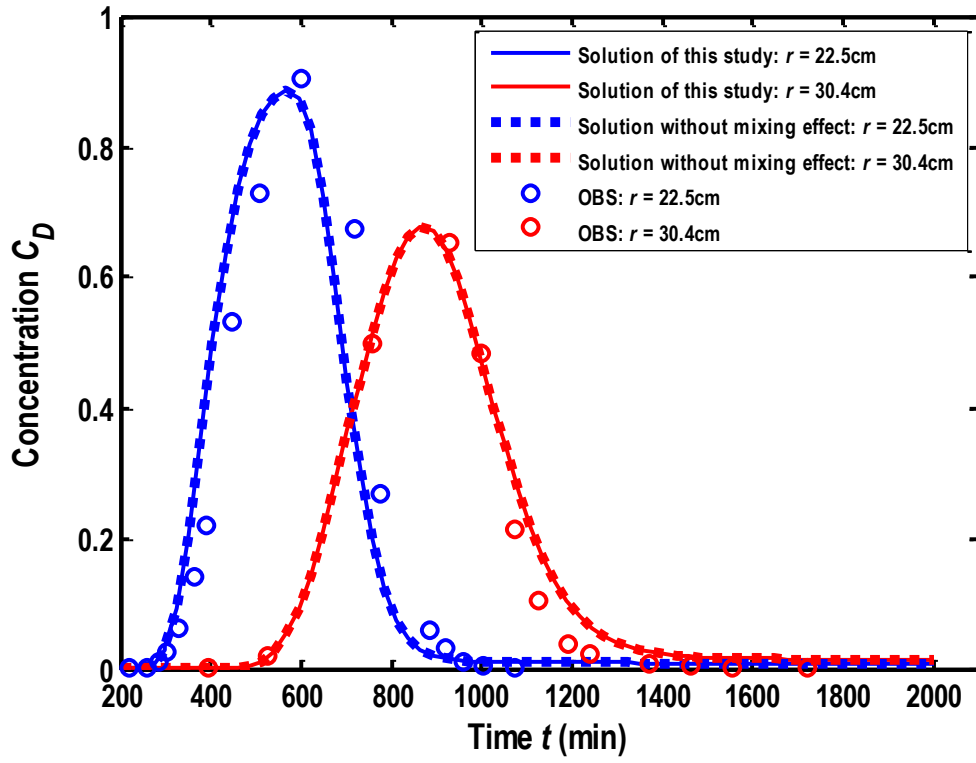

456  
457

**Figure S4.** Fitness of observed BTC by the solutions of this study.
